# Supplementary material for: Multiple Approaches at Admission Based on Lung Ultrasound and Biomarkers Improves Risk Identification in COVID-19 Patients
Source: MDPI journal article supplement (doi:10.3390/jcm10235478), 2021-11-23
Supplement: s1 [file s1]

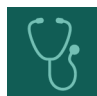

## Supplementary Materials

**Table S1.** Outcomes by PANDEMYC score at baseline (comparison between patients with PANDEMYC score > P75 and the rest of population).

| Variable                                                                         | TOTAL     | ≤P75      | >P75      | <i>p</i> -Value  |
|----------------------------------------------------------------------------------|-----------|-----------|-----------|------------------|
| <b>Primary outcome (n (%)):</b>                                                  |           |           |           |                  |
| • ICU admission and/or death                                                     | 15 (10.4) | 7 (6.5)   | 8 (22.2)  | <b>0.012</b>     |
| <b>Secondary outcomes:</b>                                                       |           |           |           |                  |
| • Length of stay (days)                                                          | 7 (5)     | 7 (4)     | 11 (6)    | <b>&lt;0.001</b> |
| • Necessity of higher O2 therapy at 48/72 h (n (%))                              | 47 (34.1) | 25 (25.0) | 14 (53.8) | <b>0.005</b>     |
| • Necessity to update COVID-19 treatment at 48/72 h (n (%))                      | 53 (37.9) | 34 (34.0) | 11 (39.3) | 0.605            |
| • Necessity of higher O2 therapy or update COVID-19 treatment at 48/72 h (n (%)) | 66 (48.5) | 40 (40.4) | 16 (61.5) | 0.054            |

ICU: Intensive care unit. Bold results are statistically significant.

**Table S2.** Receiver operating characteristic curves comparison.

| ROC Curves Compared                    | AUC Difference CI (95%) | <i>p</i> -Value |
|----------------------------------------|-------------------------|-----------------|
| ST2 concentrations vs. PANDEMYC score  | 0.002 (-0.147–0.151)    | 0.983           |
| ST2 concentrations vs. LUS (LUZ-score) | 0.015 (-0.185–0.216)    | 0.880           |
| ST2 concentrations vs. Model 1 †       | -0.074 (-0.227–0.078)   | 0.339           |
| ST2 concentrations vs. Model 2 ‡       | -0.076 (-0.226–0.074)   | 0.321           |
| PANDEMYC score vs. LUS (LUZ-score)     | 0.014 (-0.151–0.179)    | 0.869           |
| PANDEMYC score vs. Model 1 †           | -0.076 (-0.185–0.033)   | 0.171           |
| PANDEMYC score vs. Model 2 ‡           | -0.077 (-0.179–0.024)   | 0.134           |
| LUS (LUZ-score) vs. Model 1 †          | -0.090 (-0.168–0.011)   | <b>0.025</b>    |
| LUS (LUZ-score) vs. Model 2 ‡          | -0.091 (-0.180–0.003)   | <b>0.043</b>    |
| Model 1 † vs. Model 2 ‡                | -0.002 (-0.033–0.030)   | 0.923           |

† Model 1 includes sST2 + PANDEMYC score + lung ultrasound Zaragoza score. ‡ Model 2 includes sST2 + PANDEMYC score + lung ultrasound Zaragoza score + age. Bold numbers are statistically significant. LUS: lung ultrasound.
